# Supplementary material
Source: PubMed Central journal article supplement (PMC4426591)
Supplement: SD7.pdf [file SD7.pdf]

SUPPLEMENTAL TABLE 1  
Clinical features of dengue patients

|         | Primary infection | Secondary infection |
|---------|-------------------|---------------------|
| DHF     |                   |                     |
| DENV 1  | 0                 | 2                   |
| DENV 2  | 0                 | 1                   |
| DENV 3  | 0                 | 7                   |
| DENV 4  | 1                 | 2                   |
| Unknown | 1                 | 1                   |
| DF      |                   |                     |
| DENV 1  | 0                 | 1                   |
| Unknown | 1                 | 0                   |

DENV = dengue virus; DF = dengue fever; DHF = dengue hemorrhagic fever.

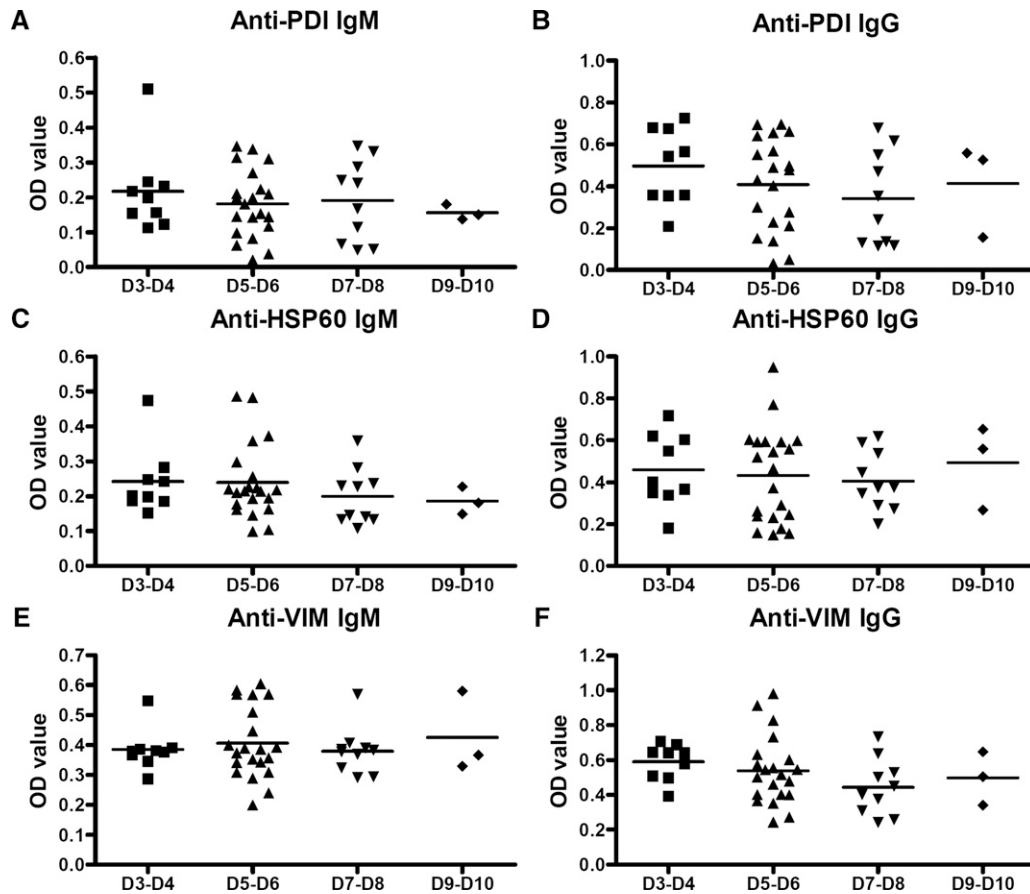

SUPPLEMENTAL FIGURE 1. Antibody titers against protein disulfide isomerase (PDI), heat shock protein (HSP60), and vimentin in sera from patients with dengue hemorrhagic fever (DHF) collected on different days. The IgM (A, C, E) and IgG (B, D, F) levels against PDI, HSP60, and vimentin (1 µg/well) in patient sera (1:25 dilution) were determined by ELISA. The OD values were obtained after correction by subtracting the OD values of the secondary antibody alone group.

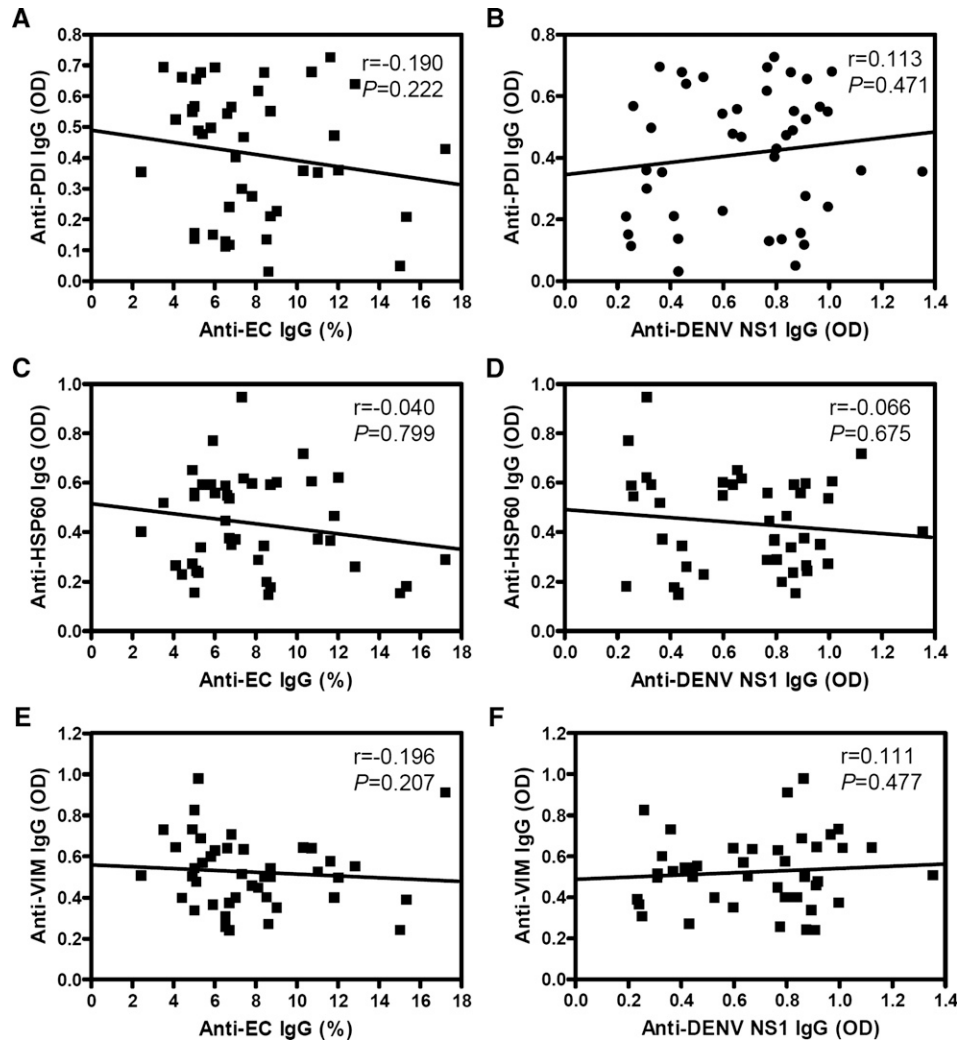

SUPPLEMENTAL FIGURE 2. No correlation of IgG titers in dengue hemorrhagic fever (DHF) patient sera against endothelial cells and dengue virus nonstructural protein 1 (DENV NS1) with target proteins. The correlation of IgG titers against DENV NS1 (1  $\mu\text{g}/\text{well}$ ) in patient sera (1:25 dilution) as determined by ELISA with anti-human microvascular endothelial cell line-1 (anti-HMEC-1) cells (1:50 dilution) as determined by flow cytometry was analyzed using Spearman's rank correlation test. The correlation of anti-HMEC-1 IgG as determined by flow cytometry (A, C, E) and anti-DENV NS1 IgG levels as determined by ELISA (B, D, F) with anti-protein disulfide isomerase (anti-PDI) (A, B), anti-heat shock protein 60 (anti-HSP60) (C, D), and anti-vimentin (E, F) as determined by ELISA was analyzed using Spearman's rank correlation test.

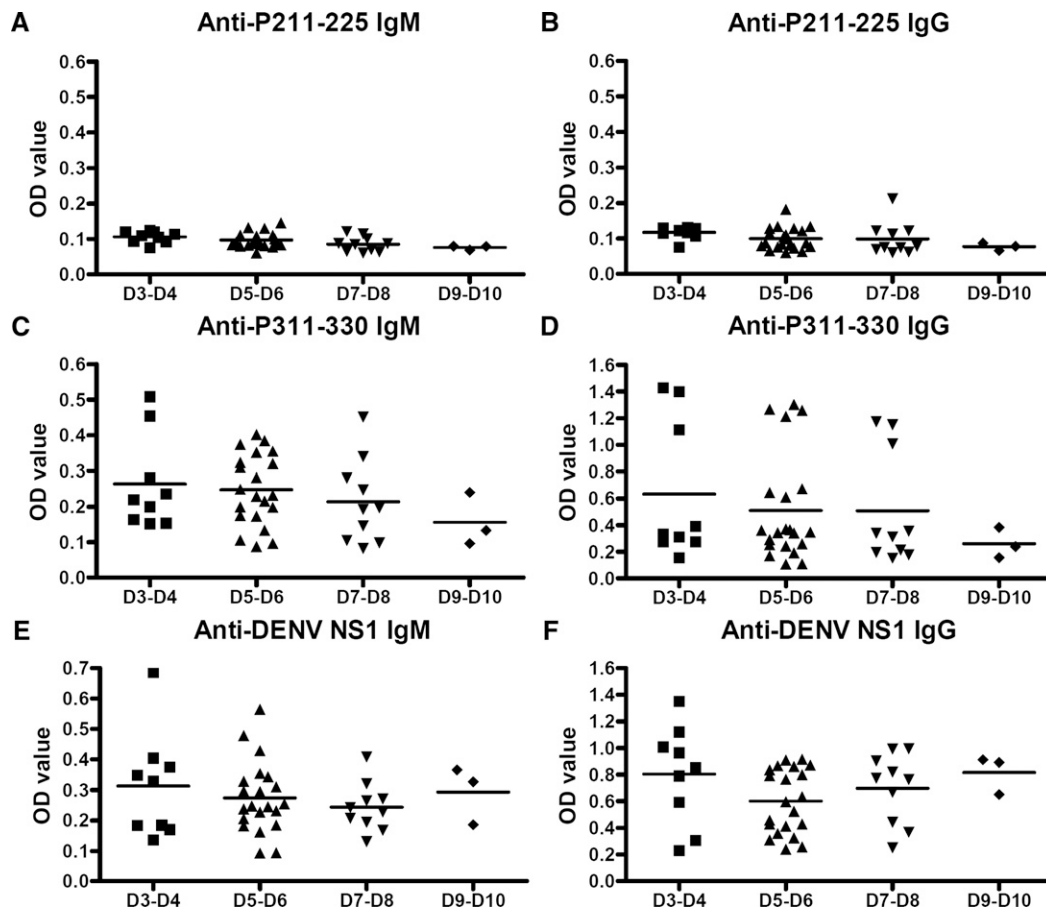

SUPPLEMENTAL FIGURE 3. Antibody titers against P211–225, P311–330, and dengue virus nonstructural protein 1 (DENV NS1) in sera from patients with dengue hemorrhagic fever (DHF) collected on different days. The IgM (A, C, E) and IgG (B, D, F) levels against P211–225, P311–330, and DENV NS1 (1  $\mu$ g/well) in patient sera (1:25 dilution) were determined by ELISA. The OD values were obtained after correction by subtracting the OD values of the secondary antibody alone group.

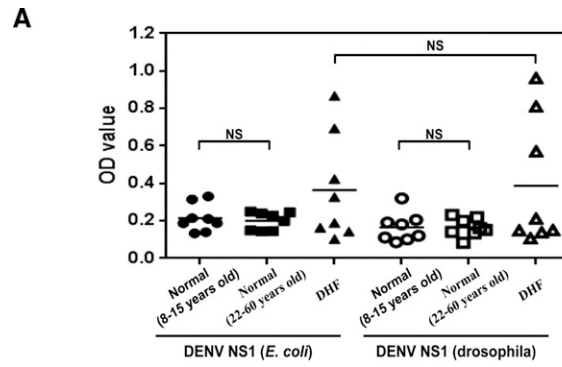

**B**

|                                         | Normal (8-15 years old) | Normal (22-60 years old) | DHF           |
|-----------------------------------------|-------------------------|--------------------------|---------------|
| Anti-DENV NS1 ( <i>E. coli</i> ) IgG    | 0.215 ± 0.072           | 0.201 ± 0.047            | 0.364 ± 0.281 |
| Anti-DENV NS1 ( <i>drosophila</i> ) IgG | 0.165 ± 0.077           | 0.166 ± 0.049            | 0.388 ± 0.344 |

SUPPLEMENTAL FIGURE 4. Antibody titers against two sources of dengue virus nonstructural protein 1 (DENV NS1) in sera from normal controls and patients with dengue hemorrhagic fever (DHF). **(A)** The IgG titers against two sources of DENV NS1 (*Escherichia coli* and *drosophila*) (1 µg/well) in patient sera (1:25 dilution) were determined by ELISA. The age range in one normal control group was 8–15 years and in another normal control group was 22–60 years. The OD values were obtained after correction by subtracting the OD values of the secondary antibody alone group. NS = no significant difference using unpaired *t* test. **(B)** The mean ± SD of OD values are shown ( $N = 8$ /group).
